# Supplementary material for: Day-to-day and within-day biological variation of cell-free DNA
Source: PubMed Central journal article supplement — eBioMedicine. 2019 Oct 21;49:284–90. doi: 10.1016/j.ebiom.2019.10.008 (PMC6945267; doi:10.1016/j.ebiom.2019.10.008), 2019-10-21

**Supplemental Table 1. CfDNA ddPCR assay information**

| <b>Locus</b>   | <b>Gene</b>   | <b>Gene location</b> | <b>Assay ID</b> | <b>Amplicon size (bp)</b> | <b>Annealing temp (°C)</b> |
|----------------|---------------|----------------------|-----------------|---------------------------|----------------------------|
| Chr15:44714185 | <i>B2M</i>    | Intron 1             | Hs03911571_cn   | 73                        | 60                         |
| Chr1:35917705  | <i>EIF2C1</i> | Exon 17-Intron 17    | Hs02702900_cn   | 70                        | 60                         |
| Chr14:20811565 | <i>RNaseP</i> | Exon 1               | N/A             | 87                        | 60                         |
| Chr.5:1253373  | <i>TERT</i>   | Exon 16              | N/A             | 88                        | 60                         |

Abbreviations: cfDNA, cell-free DNA; ddPCR, droplet digital PCR; temp, temperature; N/A, not applicable

**Supplemental Table 2. Results from the outlier analyses**

|                             | <b>Cochran's C test<br/>(analytical outliers)</b> | <b>Cochran's C test<br/>(within-subject)</b> | <b>Reed's criterion<br/>(between- subject)</b> |
|-----------------------------|---------------------------------------------------|----------------------------------------------|------------------------------------------------|
| <b>Healthy subjects</b>     |                                                   |                                              |                                                |
| <i>B2M</i>                  | ID2-7; ID4-7; ID7-2                               | ID12; ID14                                   | None                                           |
| <i>EIF2C1</i>               | ID3-4; ID12-2; ID29-4                             | ID12                                         | None                                           |
| <i>RNaseP</i>               | ID3-3; ID12-1; ID14-2; ID20-7                     | ID12                                         | None                                           |
| <i>TERT</i>                 | ID29-4                                            | ID12                                         | None                                           |
| <b>Lung cancer patients</b> |                                                   |                                              |                                                |
| <i>EIF2C1</i>               | None                                              | ID2                                          | N/A                                            |
| <i>TERT</i>                 | None                                              | ID2                                          | N/A                                            |

Abbreviations: N/A, Not applicable

**Supplemental Table 3. Sensitivity analysis: components of biological variation in all lung cancer patients (including ID-2)**

|                                | <i>EIF2C1</i>    | <i>TERT</i>      |
|--------------------------------|------------------|------------------|
| Number of samples <sup>a</sup> | 50               | 50               |
| Median (copies/ml)             | 3164·19          | 3525·40          |
| Range (copies/ml)              | 863·19-56,810·07 | 950·84-64,512·68 |
| CV <sub>i</sub> (%)            | 46·2             | 45·4             |
| CV <sub>G</sub> (%)            | 138·5            | 140·6            |
| CV <sub>A</sub> (%)            | 5·8              | 7·4              |
| II <sup>b</sup>                | 0·34             | 0·33             |
| RCV <sup>c</sup> (%)           | -70·7-241·5      | -70·3-236·8      |
| n <sup>d</sup>                 | 16               | 15               |

<sup>a</sup> Number of samples analyzed; <sup>b</sup> II, Index of individuality; <sup>c</sup> RCV, outer limits for reference change values at 95 % significance; <sup>d</sup> n, number of samples required to estimate the homeostatic set point. Abbreviations: CV<sub>i</sub>, within-subject coefficient of variation; CV<sub>G</sub>, between-subject coefficient of variation; CV<sub>A</sub>, analytical coefficient of variation.

## Supplemental figure legends

### Supplemental figure 1: ddPCR assay validation

Panel a: Intra-run variation for 30 replicates of a cfDNA sample run on the same plate. The CVs for the assays were 2-4%.

Panel b: Evaluation of linearity of a dilution series of cfDNA. The solid lines represent linear regressions, and the linear equations and  $R^2$  are shown. Input cfDNA was measured by Qubit. The experiment was conducted in triplicates

Panel c and d: Representative 2D scatter plots of the *EIF2C1/TERT* assay and the *B2M/RNaseP* assay.

## Supplemental figures

### Supplemental figure 1

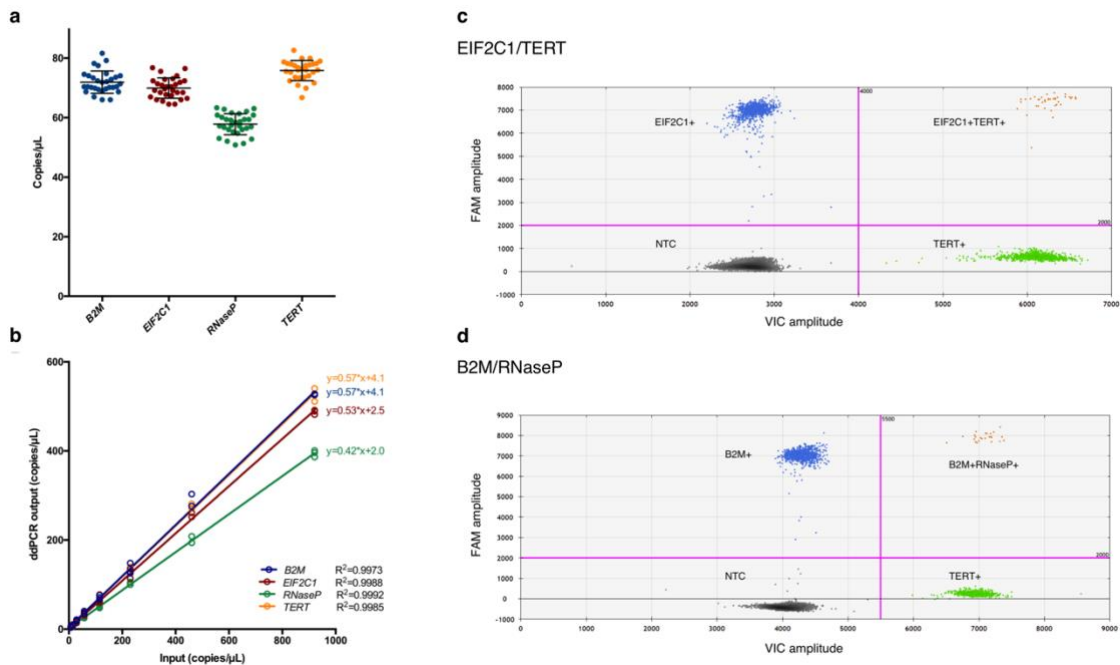

Supplement: mmc1.pdf [file mmc1.pdf]
